# Supplementary material for: Phosphorylation of the aggregate-forming protein alpha-synuclein on serine-129 inhibits its DNA-bending properties
Source: PubMed Central journal article supplement (PMC8800120; doi:10.1016/j.jbc.2021.101552), 2021-12-30
Supplement: mmc4.pdf [file mmc4.pdf]

$\alpha$ Syn or pSyn  
(57  $\mu$ M):

no prot.  $\alpha$ Syn pSyn no prot.  $\alpha$ Syn pSyn no prot.  $\alpha$ Syn pSyn no prot.  $\alpha$ Syn pSyn

1517bp

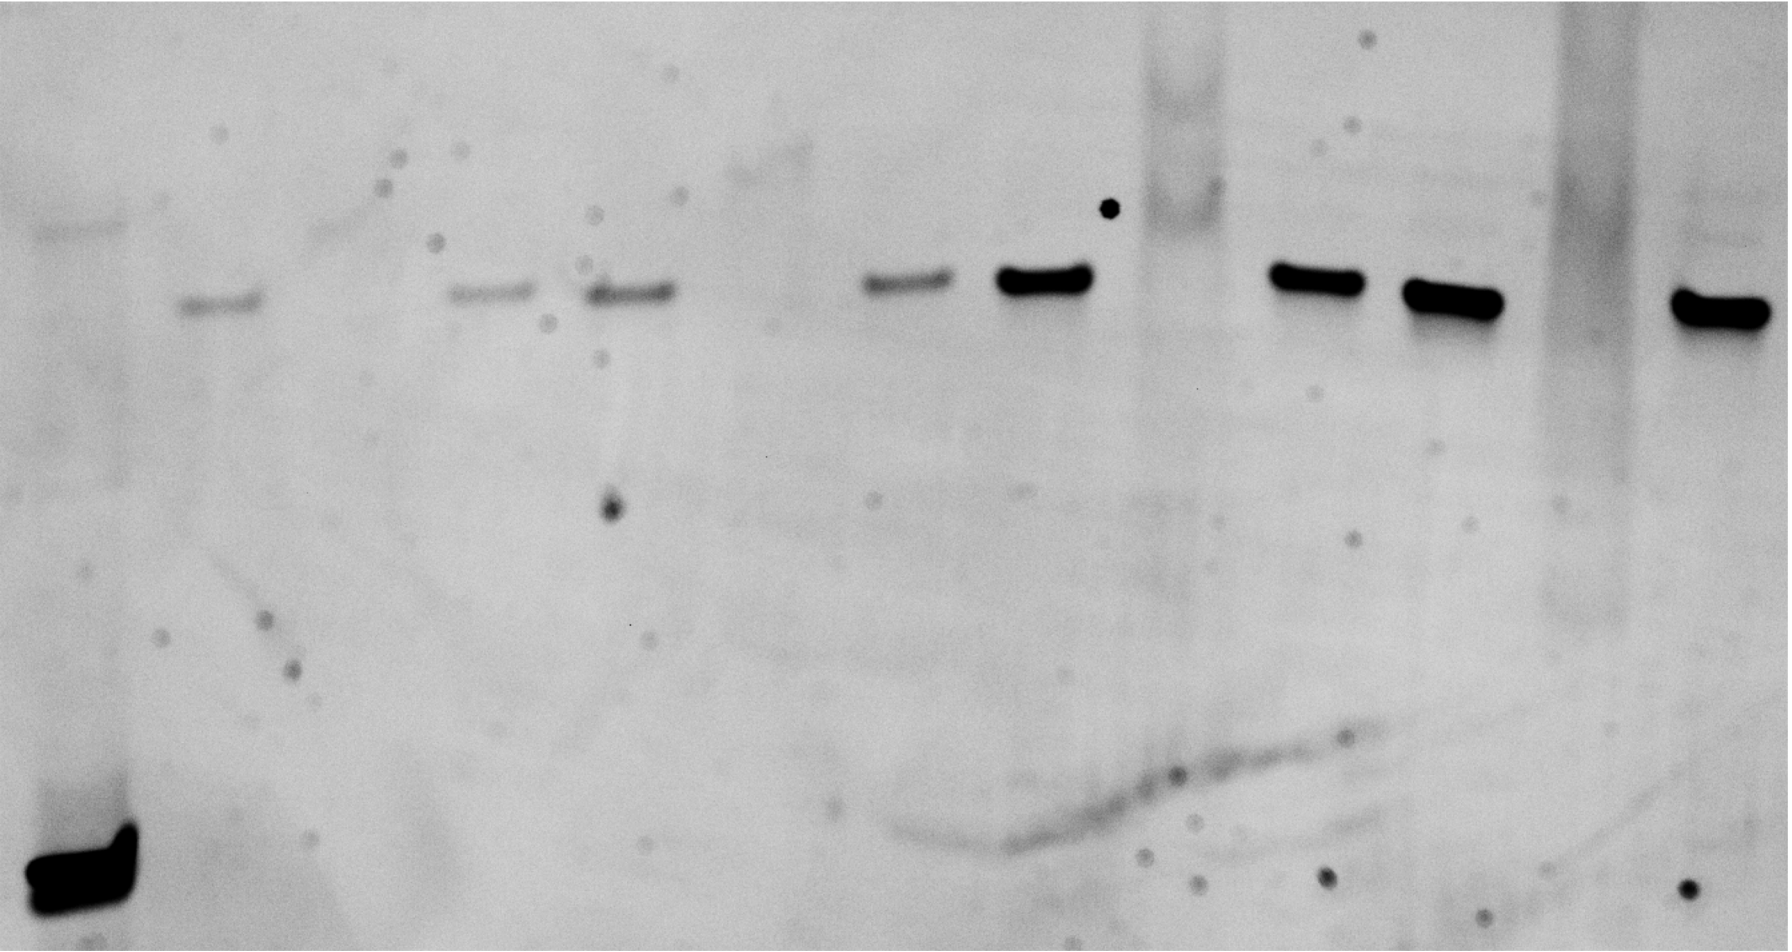

| DNA         | 0.5 |     | 1   |     | 5 |   | 10 |    |
|-------------|-----|-----|-----|-----|---|---|----|----|
| mass (ng):  | 0.5 | 0.5 | 1   | 1   | 5 | 5 | 10 | 10 |
| conc. (nM): | 0.1 | 0.1 | 0.2 | 0.2 | 1 | 1 | 2  | 2  |
