# Supplementary material for: Phosphorylation of the aggregate-forming protein alpha-synuclein on serine-129 inhibits its DNA-bending properties
Source: PubMed Central journal article supplement (PMC8800120; doi:10.1016/j.jbc.2021.101552), 2021-12-30

A

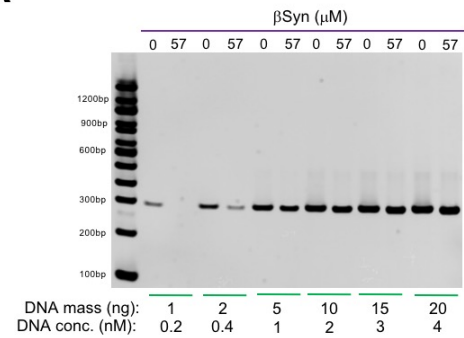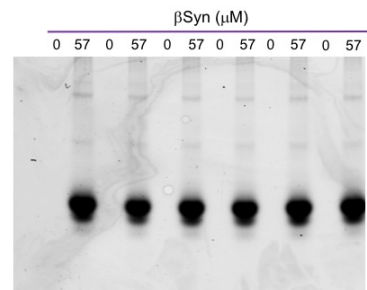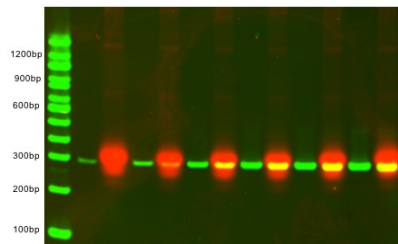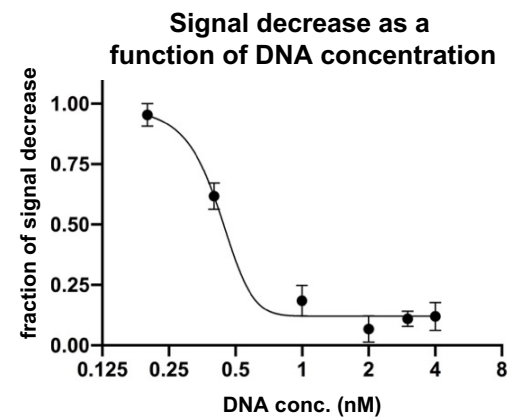

B

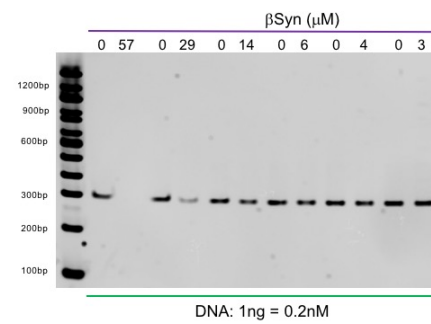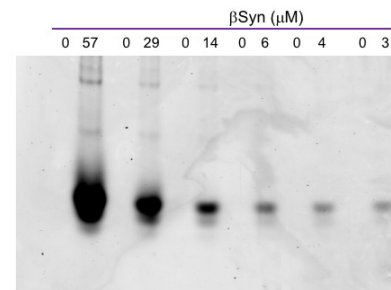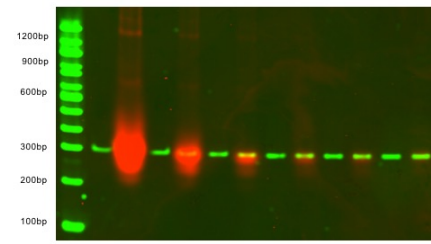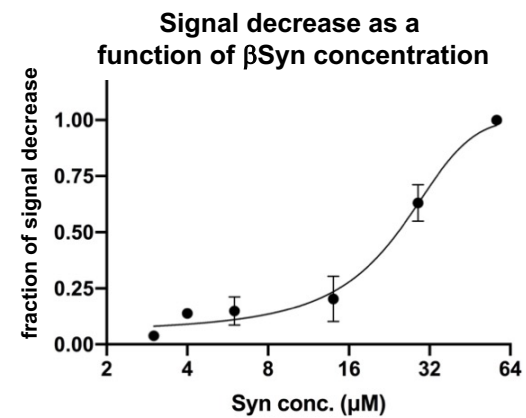

Supplement: mmc5.pdf [file mmc5.pdf]
