# Supplementary material for: Phosphorylation of the aggregate-forming protein alpha-synuclein on serine-129 inhibits its DNA-bending properties
Source: PubMed Central journal article supplement (PMC8800120; doi:10.1016/j.jbc.2021.101552), 2021-12-30
Supplement: mmc7.pdf [file mmc7.pdf]

## SUPPLEMENTARY FIGURE LEGENDS

**Supplementary Figure 1. The electrophoretic shift pattern of phospho-synuclein with DNA is similar under different gel conditions and atomic force microscopy shows evidence of alpha-synuclein binding to DNA.** (A) Three different polyacrylamide gel concentration conditions show a shift of DNA of different lengths with increasing serine-129 phosphorylated alpha-synuclein (pSyn) concentration. (B) Atomic force microscopy (AFM) images of 300 bp linear DNA deposited on a surface without the presence of alpha-synuclein (aSyn, *left*), or in the presence of 57  $\mu\text{M}$  aSyn (*right*). In the presence of aSyn, apparent DNA thickness is increased and a globular protein signal bound to DNA is often apparent (yellow arrowheads). Scale bar 200  $\mu\text{m}$ .

**Supplementary Figure 2. Alpha-synuclein-DNA binding is not strongly dependent on DNA sequence or Tris concentration.** (A) Alpha-synuclein (aSyn) binds DNA of different sequences, containing either 56 or 67% GC content, similarly (shifted fraction 56% GC at 0, 14, 29 and 57  $\mu\text{M}$  aSyn:  $0.000\pm 0.000$ ,  $0.000\pm 0.000$ ,  $0.213\pm 0.067$ ,  $0.810\pm 0.053$ , Hill slope=2.2; shifted fraction 67% GC at 0, 14, 29 and 57  $\mu\text{M}$  aSyn:  $0.000\pm 0.000$ ,  $0.000\pm 0.000$ ,  $0.137\pm 0.127$ ,  $0.693\pm 0.040$ , Hill slope=2.5; comparison shifted fraction of 57 and 67% GC content DNA for each aSyn concentration by paired t-test shows no significant differences, p between 0.162-0.373; variable slope dose-normalized response curve; N=3 gels, x-axis aSyn concentration on log scale). (B) aSyn binds DNA at different Tris concentrations similarly (shifted fraction 5 mM Tris at 0, 1, 4, 14, 29 and 57  $\mu\text{M}$  aSyn:  $0.000\pm 0.000$ ,  $0.000\pm 0.000$ ,  $0.000\pm 0.000$ ,  $0.050\pm 0.056$ ,  $0.910\pm 0.044$ ,  $1.000\pm 0.000$ ; shifted fraction 30 mM Tris at 0, 1, 4, 14, 29 and 57  $\mu\text{M}$  aSyn:  $0.000\pm 0.000$ ,  $0.000\pm 0.000$ ,  $0.000\pm 0.000$ ,  $0.010\pm 0.017$ ,  $0.830\pm 0.085$ ,  $0.997\pm 0.006$ ; comparison shifted fraction of 5 and 30 mM Tris conditions for each aSyn concentration by paired t-test shows no significant differences, p between 0.150-0.423; 4-parameter dose-response curve; N=3 gels, x-axis aSyn concentration on log scale). Glutathione-S Transferase (GST) protein run as a negative control shows little shifted species.

**Supplementary Figure 3. Alpha-synuclein-DNA binding is decreased by increasing calcium ion concentration.** Increasing concentration of the divalent cation  $\text{Ca}^{2+}$  (0-25 mM) decreases alpha-synuclein (aSyn) binding to 300 bp DNA at the highest concentration ( $R^2=0.791$ , deviation from zero slope  $p=0.0024$ , 3-parameter dose-response curve; N=2 gels; x-axis  $\text{Ca}^{2+}$  concentration on log scale).

**Supplementary Figure 4. Alpha-synuclein binds 304 bp circular DNA forms created without the presence of HMGB1 and phospho-synuclein does not.** Polyacrylamide (6%) gel electrophoresis shows a single circular DNA form created when reacting linear DNA with T4 ligase and without the presence of the DNA-bending protein HMGB1 (red arrow). Only aSyn, and not pSyn, produces a shift to a higher apparent length of these DNA circles (purple arrow).

**Supplementary Figure 5. Beta-synuclein binds DNA differently than alpha-synuclein. (A)**

*Top row:* Decreasing 300 bp DNA concentration from 4 to 0.2 nM (from right to left) with fixed beta-synuclein (bSyn) concentration (57  $\mu$ M) produces a loss of DNA signal at high bSyn-to-DNA ratios. *Second row:* Coomassie stain showing bSyn protein loaded into each lane. *Third row:* DNA gel (green) and bSyn Coomassie stain (red) localization from the same experiment. *Bottom row:* Group data showing loss of DNA signal as a function of DNA concentration (bSyn IC<sub>50</sub>=0.442  $\mu$ M, R<sup>2</sup>=0.973; absolute IC<sub>50</sub> fit; N=3 gels, x-axis DNA concentration on a log scale). **(B)** *Top row:* Increasing bSyn protein concentration from 3 to 57  $\mu$ M (increasing right to left) with 300 bp DNA concentration fixed at 0.2 nM also produces a loss of DNA signal at high bSyn-to-DNA ratios. *Second row:* Coomassie stain showing bSyn protein loaded into each lane. *Third row:* DNA gel (green) and bSyn Coomassie stain protein (red) localization from the same experiment. *Bottom row:* Group data showing loss of DNA signal as a function of bSyn concentration (bSyn EC<sub>50</sub>=24.38  $\mu$ M, R<sup>2</sup>=0.970, absolute EC<sub>50</sub> fit; N=3 gels, x-axis bSyn concentration on log scale).

**Supplementary Figure 6. Gamma-synuclein binds DNA similarly to beta-synuclein and differently than alpha-synuclein. (A)**

*Top row:* Decreasing 300 bp DNA concentration from 4 to 0.2 nM (from right to left) with fixed gamma-synuclein (gSyn) concentration (57  $\mu$ M) produces a loss of DNA signal at high gSyn-to-DNA ratios. *Second row:* Coomassie stain showing gSyn protein loaded into each lane. *Third row:* DNA gel (green) and gSyn Coomassie stain (red) localization from the same experiment. *Bottom row:* Group data showing loss of DNA signal as a function of DNA concentration (gSyn IC<sub>50</sub>=0.952  $\mu$ M, R<sup>2</sup>=0.989; absolute IC<sub>50</sub> fit; N=3 gels, x-axis DNA concentration on log scale). **(B)** *Top row:* Increasing gSyn protein concentration from 3 to 57  $\mu$ M (increasing right to left) with 300 bp DNA concentration fixed at 0.2 nM also produces a loss of DNA signal at high gSyn-to-DNA ratios. *Second row:* Coomassie stain showing gSyn protein loaded into each lane. *Third row:* DNA gel (green) and gSyn Coomassie stain protein (red) localization from the same experiment. *Bottom row:* Group data showing loss of DNA signal as a function of gSyn concentration (gSyn EC<sub>50</sub>=14.46  $\mu$ M, R<sup>2</sup>=0.956, absolute EC<sub>50</sub> fit; N=3 gels, x-axis gSyn concentration on log scale).

**Supplemental Figure 7. Docking model of alpha-synuclein bound to double-stranded DNA.**

Full animation showing a model of aSyn bound to DNA. The aSyn coordinates come from previous work showing its structure bound to a phospholipid micelle (40). The two curved alpha-helices of the N-terminal domain of aSyn fit into consecutive major grooves of B form DNA. Lysine residues within the protein are labeled.

**Supplemental Figure 8. Docking model of alpha-synuclein bound to double-stranded DNA.**

Full animation showing a model of aSyn bound to DNA. The aSyn coordinates come from previous work showing its structure bound to a phospholipid micelle (40). The first (most N-

terminal) 12 lysine residues are labeled. In this particular model, potential electrostatic interactions between lysine-21, -23, and -80 with the phosphate backbone of DNA are present.
